# Supplementary material for: Ultrasound-mediated augmented exosome release from astrocytes alleviates amyloid-β-induced neurotoxicity
Source: Theranostics. 2021 Feb 25;11(9):4351–62. doi: 10.7150/thno.52436 (PMC7977450; doi:10.7150/thno.52436)
Supplement: Supplementary file 1 — Supplementary figures and tables. [file thnov11p4351s1.pdf]

## **Supporting information**

### **Ultrasound-mediated augmented exosome release from astrocytes alleviates amyloid- $\beta$ -induced neurotoxicity**

Zhiting Deng<sup>1</sup>, Jieqiong Wang<sup>1</sup>, Yang Xiao<sup>1</sup>, Fei Li<sup>1</sup>, Lili Niu<sup>1</sup>, Xin Liu<sup>1</sup>, Long Meng<sup>\*1</sup>, Hairong Zheng<sup>\*1</sup>

<sup>1</sup>Paul C.Lauterbur research center for biomedical imaging, Shenzhen Institutes of Advanced Technology, Chinese Academy of Sciences, Shenzhen, People's Republic of China

1068 Xueyuan Avenue, Shenzhen University Town, Shenzhen, 518055, China

E-mails: long.meng@siat.ac.cn or hr.zheng@siat.ac.cn

## **Materials and Methods**

### **Protein extraction**

Make fresh extraction buffer (20 mM Tris-HCl (pH 7.5), 150 mM NaCl, 1 mM Na<sub>2</sub>EDTA, 1mM EGTA, 1% Triton, 2.5 mM sodium pyrophosphate, 1 mM beta-glycerophosphate, 1 mM Na<sub>3</sub>VO<sub>4</sub>, 1  $\mu$ g/ml leupeptin, 1 tab of complete EDTA-free Mini protease inhibitor, 1 mM PMSF). Brain tissue was homogenized in 4 $\times$ (w/v) extraction buffer on ice, and the solution was centrifuged at 12000 $\times$ g for 1 h at 4 °C, supernatant was obtained and stored at -80°C for future use. Total protein concentration was determined by BCA assay.

### **ELISA**

A $\beta$  levels were determined using a sandwich ELISA. The kits for A $\beta$ <sub>42</sub> were obtained from Jianglai (Shanghai, China). After protein extraction, A $\beta$  standards and samples were tested duplicate according to manufacturer's protocol.

## **Results**

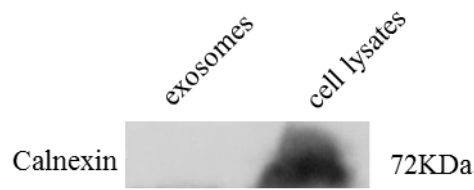

**Figure S1.** Western blotting of Calnexin, and cell lysates were used as positive control. Exosomes didn't have calnexin, showing that there was no cytoplasmic contamination in the preparation.

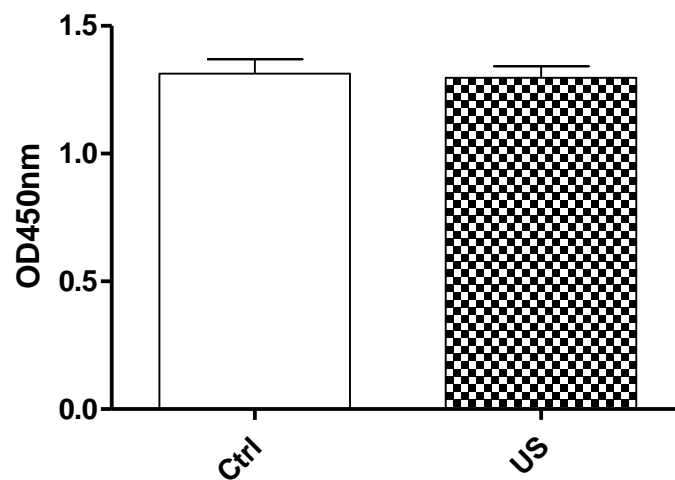

**Figure S2.** The CCK-8 assay was used to test HA cell proliferation after 72h of ultrasound treatment. As shown in Figure S2, OD450 nm did not show a significant difference between control cells and ultrasound-treated cells. Thus, ultrasound treatment did no induce increased proliferation of astrocytes.

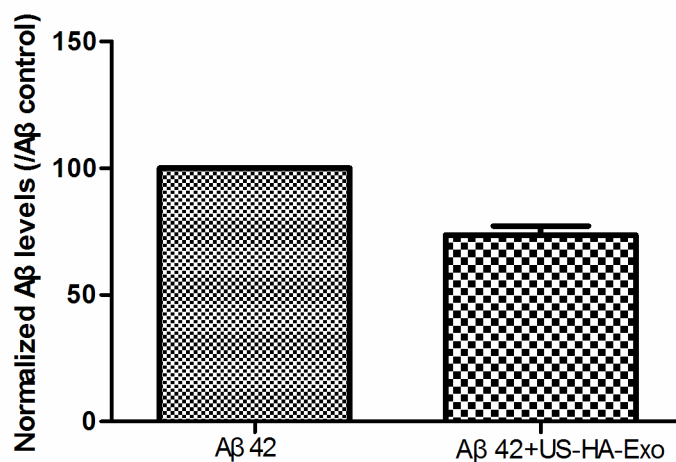

**Figure S3.** Aβ ELISA were performed of cell lysates to test intracellular Aβ.

Compared with control cells, a 26.3% decrease of A $\beta$  concentration was found in the A $\beta$ 42+US-HA-Exo group as presented in Figure S3.

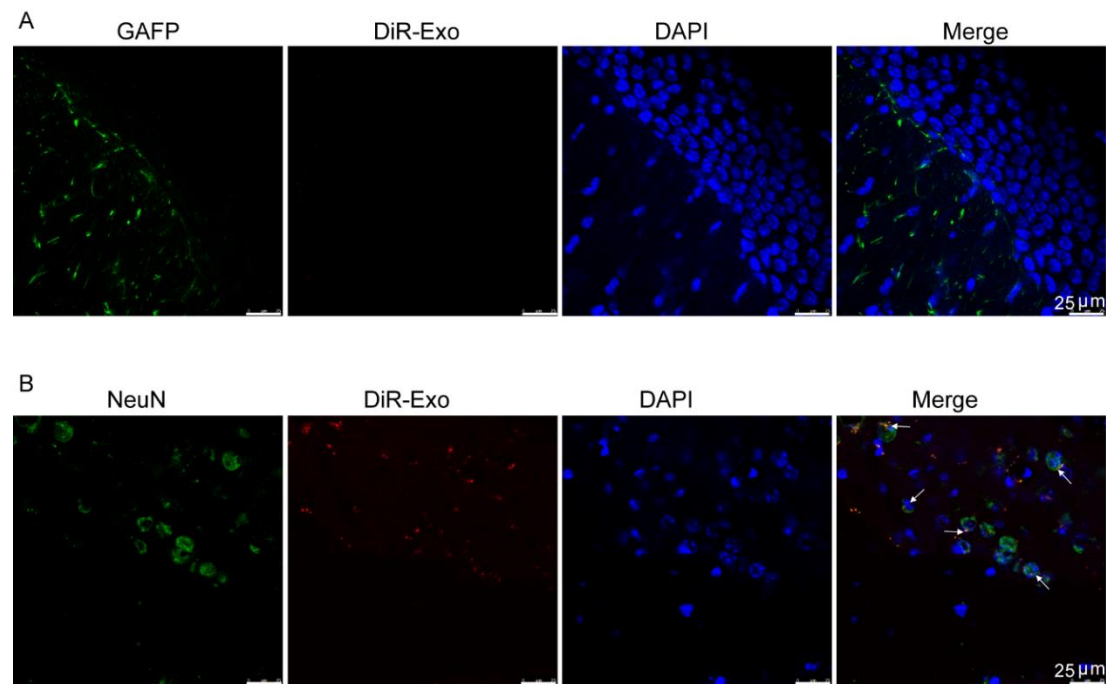

**Figure S4.** Double staining of GFAP and NeuN to detect the location of exosomes. After GFAP staining for astrocytes, or NeuN staining for neurons, confocal laser microscopy was used to detect the localization of DiR-labeled exosomes in the brain. The results displayed in Figure S4 show that exosomes were localized in the brain parenchyma, and mainly internalized in neurons, not in astrocytes.

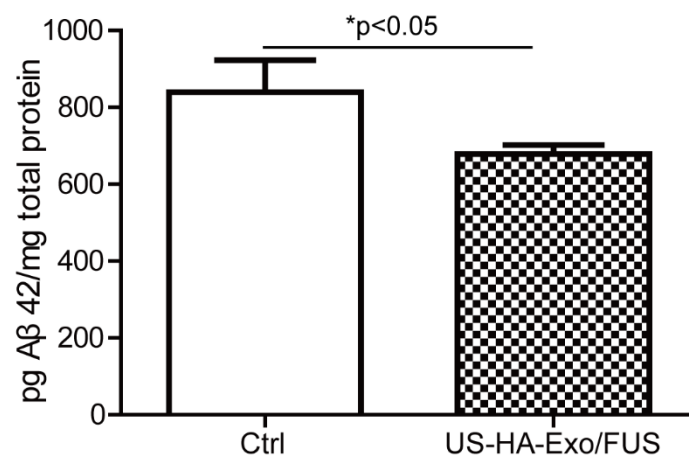

**Figure S5.** APP/PS1 mice were treated with US-HA-Exo and FUS-BBB for three weeks. Subsequently, brains were harvested, proteins were extracted, and A $\beta$  ELISA was performed to measure the levels of A $\beta$ . The results presented in Figure S5 revealed

a 19.15% decrease of A $\beta$ 42 in mouse brains in the US-HA-Exo/FUS-treated group compared to the control group (t-test,  $P < 0.05$ ).

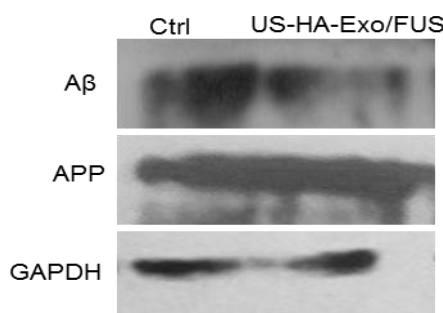

**Figure S6.** Western blotting for both APP and A $\beta$  was carried out (Figure S6). Results showed that the expression level of APP did not change after treatment. However, decreased expression of A $\beta$  proteins post US-HA-exo/FUS was evident by Western blotting.

**Table S1. Statistical analysis of differential protein**

The P-value of a significant difference between samples was calculated by t-test function in R language. The screening standard of significant difference in protein expression was  $p < 0.05$  & Fold-Change (FC)  $< 0.83$  or  $FC > 1.20$ .

| Samples     | Total number of proteins | Differential protein number | up regulated number of proteins | down regulated number of proteins |
|-------------|--------------------------|-----------------------------|---------------------------------|-----------------------------------|
| US-HA vs HA | 1226                     | 18                          | 12                              | 6                                 |

**Table S2. List of up- and down-regulated protein expression between HA-Exo and US-HA-Exo**

| UniProt ID | Protein | Full name                                      | FC(US-HA/HA) | Expression |
|------------|---------|------------------------------------------------|--------------|------------|
| P62191     | PSMC1   | 26S proteasome regulatory subunit 4            | 1.287        | up         |
| P51665     | PSMD7   | 26S proteasome non-ATPase regulatory subunit 7 | 1.329        | up         |
| Q9BUK6     | MSTO1   | Protein misato homolog 1                       | 1.375        | up         |
| P00492     | HPRT1   | Hypoxanthine-guanine phosphoribosyltransferase | 1.238        | up         |
| D6RGZ6     | VCAN    | Versican core protein                          | 1.528        | up         |
| P10768     | ESD     | S-formylglutathione hydrolase                  | 1.408        | up         |
| B7Z4C8     | RPL31   | 60S ribosomal protein L31                      | 1.303        | up         |
| P24928     | POLR2A  | DNA-directed RNA polymerase II subunit RPB1    | 1.272        | up         |
| Q9NRY6     | PLSCR3  | Phospholipid scramblase 3                      | 1.280        | up         |
| Q9BZQ8     | NIBAN1  | Protein Niban 1                                | 1.301        | up         |
| P13645     | KRT10   | Keratin, type I cytoskeletal 10                | 0.737        | down       |
| P04264     | KRT1    | Keratin, type II cytoskeletal 1                | 0.737        | down       |
| P35908     | KRT2    | Keratin, type II cytoskeletal 2 epidermal      | 0.711        | down       |

|        |        |                      |       |      |
|--------|--------|----------------------|-------|------|
| P02794 | FTH1   | Ferritin heavy chain | 0.786 | down |
| O95084 | PRSS23 | Serine protease 23   | 0.761 | down |
| Q12846 | STX4   | Syntaxin-4           | 0.673 | down |
